# Supplementary material
Source: Springer Nature journal article supplement (https://www.springermedizin.de/resource/supplementary/12901_2009_54_MOESM1_ESM.pdf/9515450)

Progressive Wavelet Level: Full  
[HA]

Se:3  
Im:10

Study Date:13/03/2008  
Study Time:4:37:19 PM  
MRN:

[R]

[L]

[FP]

C234  
W468

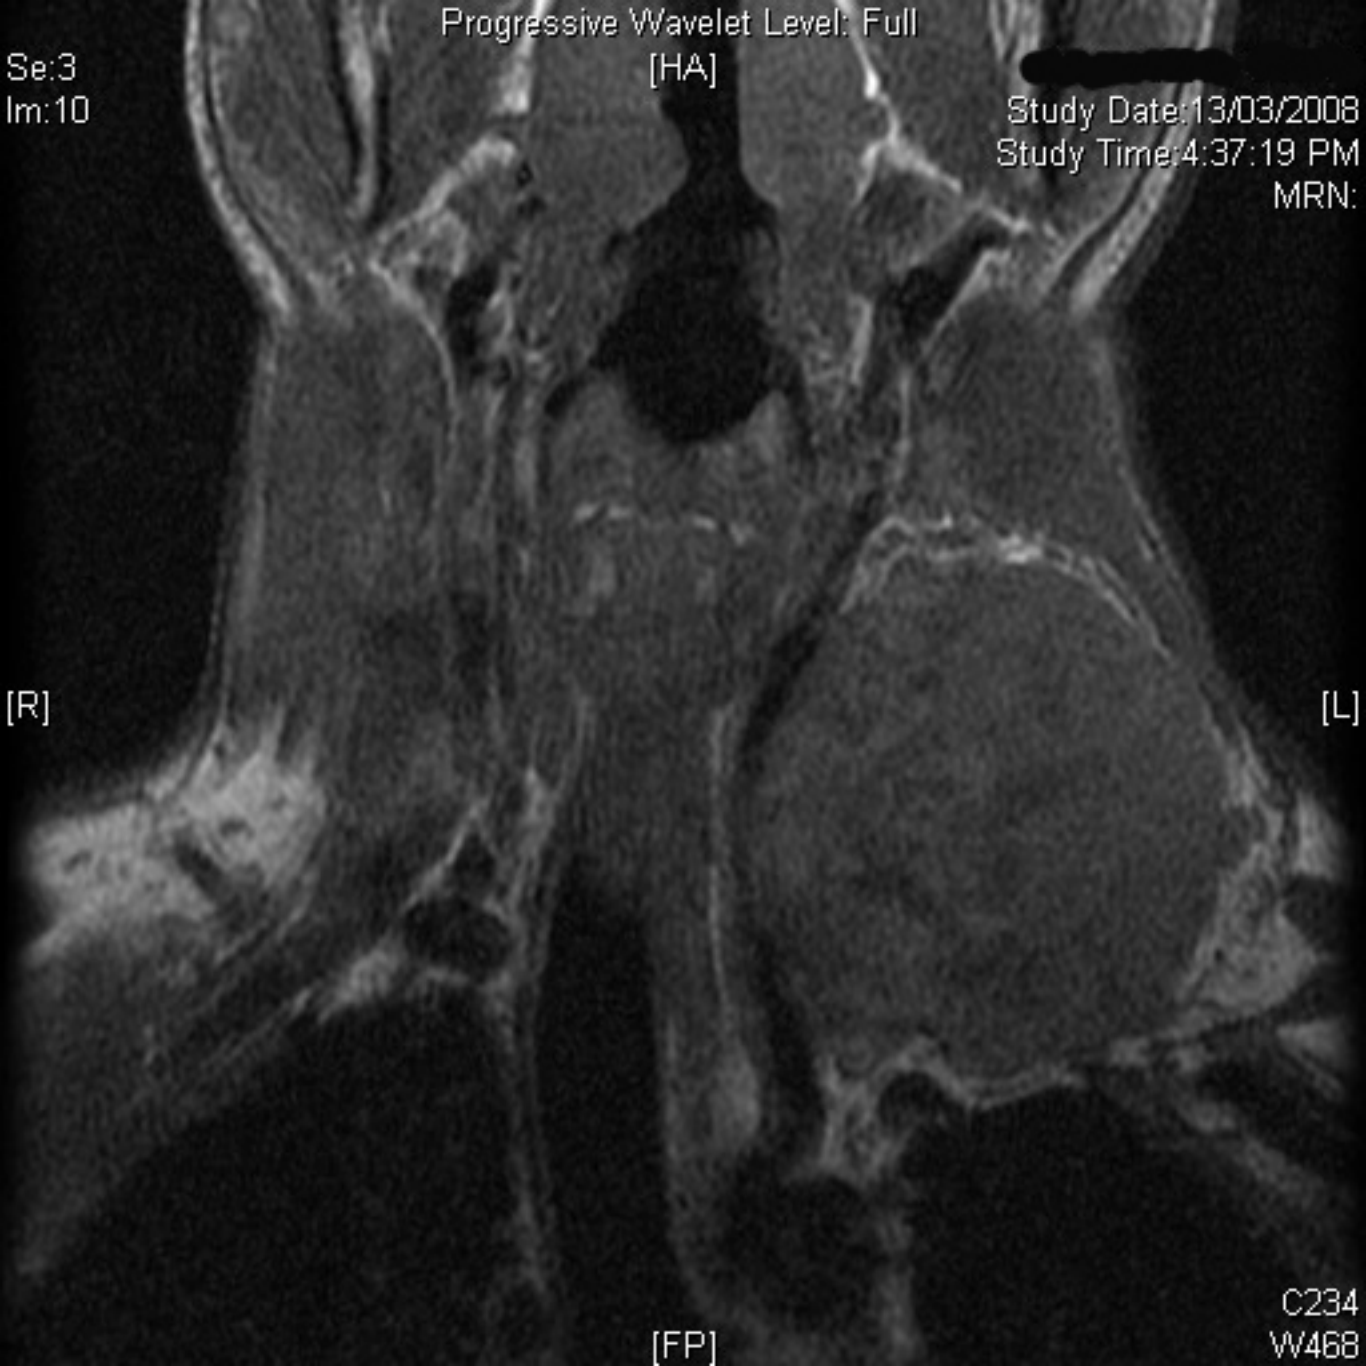

Supplement: MOESM1 [file 9515450]
